# Supplementary material for: TcESTIME: predicting high-temperature hydrogen-based superconductors
Source: Royal Society of Chemistry journal article supplement (doi:10.1039/d4sc04465g), 2024-11-13
Supplement: d4sc04465g1.pdf [file d4sc04465g1.pdf]

## Supplementary Information

### TcESTIME: Predicting high-temperature hydrogen-based superconductors

Trinidad Novoa<sup>1,2</sup>, Matías E. di Mauro<sup>1</sup>, Diego Inostroza<sup>1</sup>, Kaoutar El Haloui<sup>3</sup>, Nicolas Sisourat<sup>3</sup>, Yvon Maday<sup>2</sup>, and Julia Contreras-García<sup>1</sup>

<sup>1</sup>Laboratoire de Chimie Théorique (LCT), Sorbonne Université,  
CNRS, 4 Pl. Jussieu, 75005, Paris, France

<sup>2</sup>Laboratoire de Chimie Physique-Matière et Rayonnement (LCPMR),  
Sorbonne Université, CNRS, 4 Pl. Jussieu, 75005, Paris, France

<sup>3</sup>Laboratoire Jacques-Louis Lions (LJLL), Sorbonne Université,  
CNRS, 4 Pl. Jussieu, 75005, Paris, France

November 7, 2024

Table 1: Effective radii,  $r_{\text{eff}}$  of the core of different chemical elements, as obtained from the atomic ELF in Kohout and Savin (1996).

| Element | Z  | $r_{\text{eff}}$ |
|---------|----|------------------|
| Li      | 3  | 1.53             |
| Be      | 4  | 1.02             |
| B       | 5  | 0.75             |
| C       | 6  | 0.58             |
| N       | 7  | 0.47             |
| O       | 8  | 0.40             |
| F       | 9  | 0.34             |
| Ne      | 10 | 0.30             |
| Na      | 11 | 2.135            |
| Mg      | 12 | 1.686            |
| Al      | 13 | 1.395            |
| Si      | 14 | 1.183            |
| P       | 15 | 1.024            |
| S       | 16 | 0.912            |
| Cl      | 17 | 0.817            |
| Ar      | 18 | 0.739            |
| K       | 19 | 3.07             |
| Ca      | 20 | 2.55             |
| Sc      | 21 | 2.39             |

|    |    |      |
|----|----|------|
| Ti | 22 | 2.29 |
| V  | 23 | 2.20 |
| Cr | 24 | 2.37 |
| Mn | 25 | 2.07 |
| Fe | 26 | 2.01 |
| Co | 27 | 1.95 |
| Ni | 28 | 1.89 |
| Cu | 29 | 2.17 |
| Zn | 30 | 1.81 |
| Ga | 31 | 1.59 |
| Ge | 32 | 1.42 |
| As | 33 | 1.28 |
| Se | 34 | 1.18 |
| Br | 35 | 1.10 |
| Kr | 36 | 1.02 |
| Rb | 37 | 3.51 |
| Sr | 38 | 2.95 |
| Cd | 48 | 2.34 |

Table 2: List of binary hydrogen-based systems in the dataset, including their chemical formula, pressure (P), networking value  $\phi$ , molecularity index  $\phi^*$ ,  $H_f$ ,  $H_{DOS}$ , reference  $T_c$ , and reference from where it was taken.

| Chem. form.       | P (GPa) | $\phi$ | $\phi^*$ | $H_f$ | $H_{DOS}$ | $T_c^{\text{ref}}$ (K) | Ref. |
|-------------------|---------|--------|----------|-------|-----------|------------------------|------|
| LiH <sub>2</sub>  | 150     | 0.24   | 1.00     | 0.667 | 0.94924   | 0                      |      |
| LiH <sub>6</sub>  | 150     | 0.37   | 0.98     | 0.857 | 0.88063   | 38.34                  |      |
| LiH <sub>8</sub>  | 100     | 0.16   | 0.98     | 0.889 | 0.92588   | 31.04                  |      |
| BeH <sub>2</sub>  | 250     | 0.35   | 0.54     | 0.667 | 0.42005   | 44.1                   |      |
| BeH <sub>2</sub>  | 400     | 0.44   | 0.44     | 0.667 | 0.39974   | 62                     |      |
| MgH <sub>6</sub>  | 400     | 0.64   | 0.64     | 0.857 | 0.74105   | 271                    |      |
| CaH <sub>6</sub>  | 150     | 0.63   | 0.63     | 0.857 | 0.91338   | 235                    |      |
| SrH <sub>6</sub>  | 250     | 0.34   | 0.79     | 0.857 | 0.86045   | 156                    |      |
| ScH <sub>2</sub>  | 80      | 0.33   | 0.33     | 0.667 | 0.02726   | 32.9                   |      |
| YH <sub>4</sub>   | 120     | 0.44   | 0.6      | 0.800 | 0.39112   | 95                     |      |
| YH <sub>6</sub>   | 120     | 0.58   | 0.58     | 0.857 | 0.45269   | 264                    |      |
| ScH <sub>4</sub>  | 200     | 0.48   | 0.64     | 0.800 | 0.29856   | 98                     |      |
| ScH <sub>6</sub>  | 350     | 0.61   | 0.61     | 0.857 | 0.32246   | 169                    |      |
| PrH <sub>9</sub>  | 100     | 0.27   | 0.52     | 0.900 | 0.16150   | 0                      |      |
| CeH <sub>10</sub> | 94      | 0.53   | 0.66     | 0.909 | 0.27900   | 168                    |      |
| CeH <sub>9</sub>  | 100     | 0.51   | 0.72     | 0.900 | 0.29135   | 50                     |      |
| LaH <sub>9</sub>  | 50      | 0.31   | 0.95     | 0.900 | 0.16123   | 30                     |      |

|                   |     |      |      |       |         |       |
|-------------------|-----|------|------|-------|---------|-------|
| YH <sub>9</sub>   | 150 | 0.58 | 0.79 | 0.900 | 0.65701 | 250   |
| ScH <sub>9</sub>  | 400 | 0.66 | 0.66 | 0.900 | 0.55013 | 180   |
| YH <sub>10</sub>  | 250 | 0.58 | 0.67 | 0.909 | 0.67017 | 326   |
| LaH <sub>8</sub>  | 300 | 0.0  | 0.75 | 0.889 | 0.38922 | 131   |
| LaH <sub>10</sub> | 150 | 0.52 | 0.65 | 0.909 | 0.50395 | 274   |
| ScH <sub>9</sub>  | 300 | 0.59 | 0.94 | 0.900 | 0.53215 | 163   |
| ScH <sub>10</sub> | 250 | 0.33 | 0.89 | 0.909 | 0.53668 | 120   |
| ScH <sub>12</sub> | 350 | 0.33 | 0.86 | 0.923 | 0.58697 | 141   |
| ScH <sub>7</sub>  | 300 | 0.47 | 0.82 | 0.875 | 0.55962 | 169   |
| ScH <sub>6</sub>  | 130 | 0.26 | 0.88 | 0.857 | 0.42992 | 119   |
| TiH <sub>2</sub>  | 0   | 0.3  | 1.0  | 0.667 | 0.00053 | 7     |
| TiH <sub>2</sub>  | 0   | 0.18 | 0.4  | 0.667 | 0.03800 | 0     |
| ZrH               | 120 | 0.33 | 0.33 | 0.500 | 0.01214 | 11    |
| HfH <sub>2</sub>  | 0   | 0.17 | 0.24 | 0.667 | 0.00787 | 0     |
| HfH <sub>2</sub>  | 180 | 0.23 | 0.78 | 0.667 | 0.11542 | 8     |
| HfH <sub>2</sub>  | 260 | 0.31 | 0.33 | 0.667 | 0.07105 | 12    |
| NbH <sub>2</sub>  | 60  | 0.29 | 0.4  | 0.667 | 0.00844 | 0.5   |
| VH <sub>2</sub>   | 0   | 0.31 | 0.31 | 0.667 | 0.00539 | 0.5   |
| NbH <sub>2</sub>  | 0   | 0.28 | 0.28 | 0.667 | 0.00668 | 1.5   |
| NbH <sub>2</sub>  | 60  | 0.35 | 0.39 | 0.667 | 0.01147 | 4     |
| NbH <sub>4</sub>  | 300 | 0.28 | 0.42 | 0.800 | 0.10784 | 47    |
| TaH <sub>2</sub>  | 200 | 0.41 | 0.43 | 0.667 | 0.03040 | 7.1   |
| TaH <sub>4</sub>  | 250 | 0.27 | 0.37 | 0.800 | 0.23240 | 31    |
| TaH <sub>6</sub>  | 300 | 0.4  | 0.61 | 0.857 | 0.48226 | 135.8 |
| CrH               | 0   | 0.4  | 0.4  | 0.500 | 0.00636 | 10.6  |
| CrH <sub>3</sub>  | 81  | 0.38 | 0.38 | 0.750 | 0.07048 | 37.1  |
| TcH <sub>3</sub>  | 300 | 0.31 | 0.36 | 0.750 | 0.07314 | 9.94  |
| FeH <sub>6</sub>  | 150 | 0.36 | 1.0  | 0.857 | 0.18419 | 42.9  |
| FeH <sub>5</sub>  | 150 | 0.37 | 0.55 | 0.833 | 0.06091 | 45.8  |
| RuH               | 100 | 0.28 | 0.28 | 0.500 | 0.01618 | 0.41  |
| RuH <sub>3</sub>  | 100 | 0.29 | 0.29 | 0.750 | 0.08244 | 3.57  |
| RuH <sub>3</sub>  | 200 | 0.29 | 0.29 | 0.750 | 0.13508 | 1.25  |
| OsH               | 100 | 0.34 | 0.34 | 0.500 | 0.00788 | 2.1   |
| CoH               | 5   | 0.27 | 0.27 | 0.500 | 0.00479 | 0.11  |
| PdH               | 0   | 0.2  | 0.2  | 0.500 | 0.15803 | 9     |
| PdH               | 0   | 0.2  | 0.2  | 0.500 | 0.15803 | 5     |
| PtH               | 100 | 0.27 | 0.27 | 0.500 | 0.14640 | 15    |
| PtH               | 80  | 0.28 | 0.32 | 0.500 | 0.08208 | 25    |
| AuH               | 220 | 0.27 | 0.27 | 0.500 | 0.02230 | 21    |
| BH                | 175 | 0.51 | 0.51 | 0.500 | 0.27223 | 21.4  |
| BH <sub>3</sub>   | 360 | 0.58 | 0.84 | 0.750 | 0.53550 | 125   |
| AlH <sub>3</sub>  | 73  | 0.41 | 0.41 | 0.750 | 0.67764 | 11.5  |
| GaH <sub>3</sub>  | 120 | 0.1  | 0.0  | 0.750 | 0.56491 | 102   |
| InH <sub>5</sub>  | 150 | 0.3  | 0.99 | 0.833 | 0.34432 | 27.1  |

|                                                 |     |      |      |       |         |       |
|-------------------------------------------------|-----|------|------|-------|---------|-------|
| InH <sub>3</sub>                                | 200 | 0.31 | 0.9  | 0.750 | 0.28419 | 40.5  |
| SiH <sub>4</sub>                                | 125 | 0.48 | 0.81 | 0.800 | 0.59684 | 55    |
| SiH <sub>4</sub>                                | 120 | 0.54 | 0.73 | 0.800 | 0.40524 | 74    |
| SiH <sub>4</sub>                                | 400 | 0.47 | 0.57 | 0.800 | 0.54972 | 35    |
| SiH <sub>4</sub>                                | 610 | 0.5  | 0.6  | 0.800 | 0.44245 | 110   |
| SiH <sub>4</sub>                                | 300 | 0.48 | 0.98 | 0.800 | 0.25117 | 35.1  |
| SiH <sub>4</sub>                                | 190 | 0.33 | 0.84 | 0.800 | 0.62307 | 16.5  |
| Si <sub>2</sub> H <sub>6</sub>                  | 200 | 0.48 | 0.77 | 0.750 | 0.35811 | 80    |
| Si <sub>2</sub> H <sub>6</sub>                  | 275 | 0.02 | 0.02 | 0.750 | 0.37144 | 153   |
| Si <sub>2</sub> H <sub>6</sub>                  | 300 | 0.54 | 0.96 | 0.750 | 0.35998 | 42    |
| GeH <sub>4</sub>                                | 220 | 0.4  | 0.9  | 0.800 | 0.36688 | 64    |
| GeH <sub>4</sub>                                | 250 | 0.31 | 0.95 | 0.800 | 0.41384 | 57    |
| GeH <sub>4</sub>                                | 500 | 0.42 | 0.65 | 0.800 | 0.50236 | 84    |
| GeH <sub>4</sub> (H <sub>2</sub> ) <sub>2</sub> | 250 | 0.35 | 0.93 | 0.889 | 0.52831 | 90    |
| GeH <sub>4</sub>                                | 280 | 0.35 | 0.66 | 0.800 | 0.42974 | 67    |
| Ge <sub>3</sub> H <sub>11</sub>                 | 285 | 0.33 | 0.42 | 0.786 | 0.47560 | 43    |
| GeH <sub>3</sub>                                | 180 | 0.33 | 0.4  | 0.750 | 0.27853 | 90    |
| GeH <sub>3</sub>                                | 180 | 0.32 | 0.35 | 0.750 | 0.24793 | 140   |
| SnH <sub>8</sub>                                | 250 | 0.24 | 0.9  | 0.889 | 0.54617 | 72    |
| SnH <sub>4</sub>                                | 120 | 0.23 | 0.98 | 0.800 | 0.30038 | 22    |
| SnH <sub>4</sub>                                | 200 | 0.24 | 0.95 | 0.800 | 0.37070 | 62    |
| SnH <sub>4</sub>                                | 600 | 0.29 | 0.93 | 0.800 | 0.38303 | 95    |
| SnH <sub>12</sub>                               | 250 | 0.26 | 0.91 | 0.923 | 0.64144 | 93    |
| SnH <sub>14</sub>                               | 300 | 0.37 | 0.96 | 0.933 | 0.71983 | 97    |
| PbH <sub>4</sub> (H <sub>2</sub> ) <sub>2</sub> | 230 | 0.21 | 0.97 | 0.889 | 0.43717 | 107   |
| PH <sub>4</sub>                                 | 80  | 0.15 | 1.0  | 0.800 | 0.28436 | 1.9   |
| PH <sub>2</sub>                                 | 80  | 0.62 | 1.0  | 0.667 | 0.16935 | 29.5  |
| AsH                                             | 300 | 0.45 | 0.45 | 0.500 | 0.16926 | 21.2  |
| AsH <sub>8</sub>                                | 450 | 0.43 | 0.91 | 0.889 | 0.53430 | 151.4 |
| SbH                                             | 175 | 0.37 | 0.39 | 0.500 | 0.13976 | 14.6  |
| SbH <sub>4</sub>                                | 150 | 0.31 | 0.95 | 0.800 | 0.32348 | 102.2 |
| BiH <sub>2</sub>                                | 125 | 0.33 | 0.97 | 0.667 | 0.19364 | 39    |
| BiH <sub>3</sub>                                | 270 | 0.32 | 0.85 | 0.750 | 0.34636 | 65    |
| SbH <sub>3</sub>                                | 170 | 0.35 | 0.91 | 0.750 | 0.27787 | 68    |
| BiH                                             | 250 | 0.33 | 0.0  | 0.500 | 0.22987 | 30    |
| BiH <sub>2</sub>                                | 300 | 0.32 | 0.94 | 0.667 | 0.21725 | 65    |
| BiH <sub>4</sub>                                | 150 | 0.3  | 0.96 | 0.800 | 0.29603 | 93    |
| BiH <sub>6</sub>                                | 300 | 0.29 | 0.85 | 0.857 | 0.46471 | 113   |
| (H <sub>2</sub> S) <sub>2</sub> H <sub>2</sub>  | 200 | 0.69 | 0.69 | 0.750 | 0.47654 | 204   |
| H <sub>3</sub> S                                | 150 | 0.71 | 0.71 | 0.750 | 0.48732 | 225   |
| H <sub>4</sub> S <sub>3</sub>                   | 140 | 0.38 | 0.77 | 0.571 | 0.22762 | 2.1   |
| H <sub>5</sub> S <sub>2</sub>                   | 130 | 0.28 | 0.89 | 0.714 | 0.40847 | 79    |
| HSe <sub>2</sub>                                | 300 | 0.46 | 0.56 | 0.333 | 0.14294 | 5     |
| HSe                                             | 300 | 0.53 | 0.0  | 0.500 | 0.14283 | 42    |

|                                |     |      |      |       |         |      |
|--------------------------------|-----|------|------|-------|---------|------|
| H <sub>3</sub> Se              | 200 | 0.54 | 0.54 | 0.750 | 0.48394 | 116  |
| HSe                            | 300 | 0.52 | 0.55 | 0.500 | 0.15501 | 23   |
| H <sub>4</sub> Te              | 170 | 0.41 | 0.94 | 0.800 | 0.24914 | 104  |
| H <sub>5</sub> Te <sub>2</sub> | 200 | 0.37 | 0.86 | 0.714 | 0.25675 | 58   |
| HTe                            | 150 | 0.42 | 0.42 | 0.500 | 0.14264 | 28   |
| H <sub>4</sub> Te              | 270 | 0.36 | 0.92 | 0.800 | 0.28495 | 76   |
| PoH <sub>4</sub>               | 250 | 0.26 | 0.95 | 0.800 | 0.28468 | 53.6 |
| PoH                            | 300 | 0.0  | 0.31 | 0.500 | 0.20401 | 0.65 |
| PoH <sub>2</sub>               | 200 | 0.31 | 0.97 | 0.667 | 0.16772 | 0    |
| PoH <sub>6</sub>               | 200 | 0.34 | 0.97 | 0.857 | 0.32384 | 4.68 |
| HBr                            | 200 | 0.38 | 0.66 | 0.500 | 0.17697 | 51   |
| HCl                            | 360 | 0.49 | 0.68 | 0.500 | 0.17748 | 40   |
| HBr                            | 150 | 0.38 | 0.7  | 0.500 | 0.13735 | 27   |
| HCl                            | 250 | 0.39 | 0.76 | 0.500 | 0.13565 | 20   |
| H <sub>2</sub> I               | 100 | 0.12 | 0.99 | 0.667 | 0.09580 | 8    |
| H <sub>4</sub> I               | 300 | 0.25 | 0.95 | 0.800 | 0.31063 | 12.5 |
| H <sub>2</sub> I               | 100 | 0.0  | 0.99 | 0.667 | 0.11697 | 5.3  |
| H <sub>2</sub> I               | 240 | 0.27 | 0.94 | 0.667 | 0.16466 | 33   |
| MgH <sub>2</sub>               | 180 | 0.34 | 0.34 | 0.667 | 0.35378 | 23   |
| MgH <sub>4</sub>               | 100 | 0.27 | 1.0  | 0.800 | 0.66683 | 37   |
| MgH <sub>12</sub>              | 140 | 0.36 | 0.97 | 0.923 | 0.91945 | 60   |
| PH <sub>2</sub>                | 260 | 0.39 | 0.54 | 0.667 | 0.40477 | 95   |
| H                              | 500 | 0.64 | 0.64 | 1.00  | 1.00000 | 318  |
| H                              | 450 | 0.52 | 0.94 | 1.00  | 1.00000 | 109  |

Table 3: List of X-RE-H systems (X is *s*-block element, RE is rare earth) in the dataset, including their chemical formula, pressure (P), networking value  $\phi$ , molecularity index  $\phi^*$ ,  $H_f$ ,  $H_{DOS}$ , reference  $T_c$ , and reference from where it was taken.

| P (GPa)                           | $\phi$ | $\phi^*$ | $H_f$ | $H_{DOS}$ | $T_c^{\text{ref}}$ (K) | Ref. |     |
|-----------------------------------|--------|----------|-------|-----------|------------------------|------|-----|
| LiScH <sub>10</sub>               | 300    | 0.30     | 0.93  | 0.833     | 0.280                  | 52   | [1] |
| Li <sub>2</sub> ScH <sub>20</sub> | 300    | 0.36     | 0.97  | 0.870     | 0.745                  | 242  | [1] |
| Li <sub>2</sub> ScH <sub>16</sub> | 300    | 0.63     | 0.69  | 0.842     | 0.684                  | 262  | [1] |
| Li <sub>2</sub> ScH <sub>16</sub> | 230    | 0.63     | 0.69  | 0.842     | 0.686                  | 281  | [1] |
| Li <sub>2</sub> ScH <sub>17</sub> | 300    | 0.57     | 0.83  | 0.850     | 0.600                  | 94   | [1] |
| Li <sub>2</sub> LaH <sub>17</sub> | 300    | 0.50     | 0.79  | 0.850     | 0.671                  | 118  | [1] |
| Li <sub>2</sub> YH <sub>16</sub>  | 300    | 0.59     | 0.71  | 0.842     | 0.769                  | 251  | [1] |
| Li <sub>2</sub> YH <sub>17</sub>  | 300    | 0.55     | 0.81  | 0.850     | 0.798                  | 64   | [1] |
| CaYH <sub>20</sub>                | 600    | 0.54     | 0.70  | 0.909     | 0.819                  | 250  | [2] |
| Ca <sub>2</sub> YH <sub>18</sub>  | 200    | 0.58     | 0.67  | 0.857     | 0.752                  | 217  | [2] |

|                             |     |      |      |       |       |     |     |
|-----------------------------|-----|------|------|-------|-------|-----|-----|
| $\text{Ca}_3\text{YH}_{24}$ | 200 | 0.58 | 0.67 | 0.857 | 0.800 | 225 | [2] |
| $\text{CaY}_3\text{H}_{24}$ | 200 | 0.55 | 0.63 | 0.857 | 0.558 | 252 | [2] |
| $\text{CaScH}_2$            | 250 | 0.19 | 0.21 | 0.500 | 0.024 | 31  | [3] |
| $\text{CaScH}_4$            | 200 | 0.17 | 0.49 | 0.667 | 0.098 | 2   | [3] |
| $\text{CaScH}_6$            | 200 | 0.36 | 0.36 | 0.750 | 0.601 | 57  | [3] |
| $\text{CaScH}_8$            | 200 | 0.42 | 0.88 | 0.800 | 0.557 | 212 | [3] |
| $\text{CaScH}_{12}$         | 160 | 0.55 | 0.68 | 0.857 | 0.486 | 175 | [3] |
| $\text{BeLaH}_8$            | 50  | 0.29 | 0.53 | 0.800 | 0.668 | 191 | [4] |
| $\text{BeYH}_8$             | 100 | 0.12 | 0.36 | 0.800 | 0.697 | 249 | [4] |
| $\text{BeCeH}_8$            | 30  | 0.29 | 0.52 | 0.800 | 0.779 | 201 | [5] |
| $\text{BeThH}_7$            | 20  | 0.28 | 0.48 | 0.778 | 0.502 | 70  | [5] |

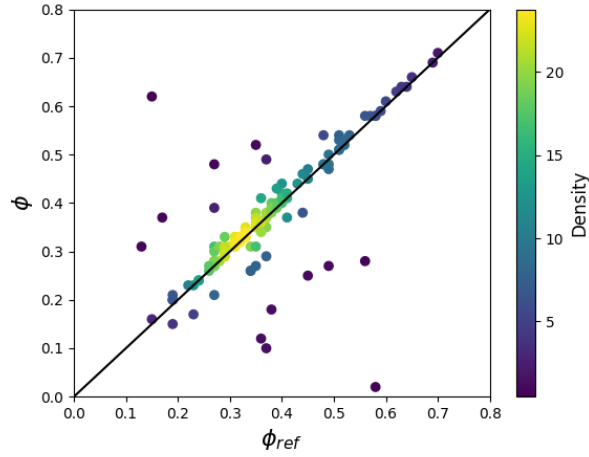

Figure 1: Values of  $\phi$  computed with TcESTIME compared to the reference values,  $\phi_{ref}$ , of the binary database. Colors represent the density of points per unit area.

Table 4: Prediction of the critical temperature of all binary and ternary compounds using four different fits, namely the least squares regression (LS), gradient boosting regression (GBR), and two different symbolic regression fits (SR2 and SR4). Reference  $T_c$  is provided for comparison.

| Chem. form.    | $T_c$ | $T_c^{LS}$ | $T_c^{GBR}$ | $T_c^{SR2}$ | $T_c^{SR4}$ |
|----------------|-------|------------|-------------|-------------|-------------|
| $\text{LiH}_2$ | 0.00  | 62.33      | -0.55       | 30.69       | 73.20       |
| $\text{LiH}_6$ | 38.34 | 129.24     | 39.18       | 101.89      | 158.31      |
| $\text{LiH}_8$ | 31.04 | 53.80      | 28.74       | 53.82       | 74.16       |

|                   |        |        |        |        |        |
|-------------------|--------|--------|--------|--------|--------|
| BeH <sub>2</sub>  | 44.10  | 70.32  | 49.54  | 68.90  | 71.01  |
| BeH <sub>2</sub>  | 62.00  | 89.20  | 105.68 | 82.98  | 87.09  |
| MgH <sub>6</sub>  | 271.00 | 217.04 | 275.09 | 239.65 | 251.20 |
| CaH <sub>6</sub>  | 235.00 | 229.59 | 241.77 | 266.06 | 274.52 |
| SrH <sub>6</sub>  | 156.00 | 117.01 | 148.54 | 142.03 | 143.80 |
| ScH <sub>2</sub>  | 32.90  | 20.77  | 24.50  | 21.67  | 17.06  |
| YH <sub>4</sub>   | 95.00  | 108.01 | 124.09 | 118.97 | 113.16 |
| YH <sub>6</sub>   | 264.00 | 164.71 | 210.94 | 187.31 | 177.93 |
| ScH <sub>4</sub>  | 98.00  | 107.66 | 105.95 | 103.94 | 107.85 |
| ScH <sub>6</sub>  | 169.00 | 154.13 | 117.39 | 158.09 | 157.94 |
| PrH <sub>9</sub>  | 0.00   | 50.93  | 11.00  | 97.18  | 53.24  |
| CeH <sub>10</sub> | 168.00 | 134.20 | 163.88 | 152.66 | 139.43 |
| CeH <sub>9</sub>  | 50.00  | 129.40 | 126.46 | 137.49 | 135.08 |
| LaH <sub>9</sub>  | 30.00  | 59.84  | 53.60  | 46.61  | 61.08  |
| YH <sub>9</sub>   | 250.00 | 197.63 | 248.68 | 206.47 | 230.68 |
| ScH <sub>9</sub>  | 180.00 | 212.65 | 286.77 | 239.15 | 240.20 |
| YH <sub>10</sub>  | 326.00 | 201.08 | 240.50 | 247.48 | 236.49 |
| LaH <sub>8</sub>  | 131.00 | -9.46  | 126.93 | 48.47  | 0.00   |
| LaH <sub>10</sub> | 274.00 | 162.19 | 269.91 | 205.17 | 183.86 |
| ScH <sub>9</sub>  | 163.00 | 186.90 | 173.66 | 152.89 | 211.19 |
| ScH <sub>10</sub> | 120.00 | 101.78 | 124.49 | 107.08 | 120.41 |
| ScH <sub>12</sub> | 141.00 | 106.92 | 138.73 | 125.24 | 128.84 |
| ScH <sub>7</sub>  | 169.00 | 145.19 | 169.16 | 144.08 | 165.39 |
| ScH <sub>6</sub>  | 119.00 | 67.28  | 85.28  | 69.36  | 77.73  |
| TiH <sub>2</sub>  | 7.00   | -2.07  | 13.07  | 0.91   | 2.16   |
| TiH <sub>2</sub>  | 0.00   | 8.96   | -1.62  | 19.96  | 10.98  |
| ZrH               | 11.00  | 7.85   | 15.85  | 6.09   | 7.39   |
| HfH <sub>2</sub>  | 0.00   | 0.83   | 17.82  | 10.83  | 4.72   |
| HfH <sub>2</sub>  | 8.00   | 24.63  | 7.15   | 20.07  | 24.46  |
| HfH <sub>2</sub>  | 12.00  | 29.62  | 8.26   | 34.28  | 25.87  |
| NbH <sub>2</sub>  | 0.50   | 8.51   | 3.26   | 10.73  | 8.34   |
| VH <sub>2</sub>   | 0.50   | 7.08   | 1.52   | 9.64   | 7.13   |
| NbH <sub>2</sub>  | 1.50   | 6.59   | 2.43   | 10.73  | 7.16   |
| NbH <sub>2</sub>  | 4.00   | 14.57  | 13.16  | 13.49  | 11.73  |
| NbH <sub>4</sub>  | 47.00  | 39.20  | 35.79  | 63.96  | 37.81  |
| TaH <sub>2</sub>  | 7.10   | 29.49  | 12.22  | 22.43  | 22.38  |
| TaH <sub>4</sub>  | 31.00  | 51.14  | 33.90  | 98.25  | 53.53  |
| TaH <sub>6</sub>  | 135.80 | 113.22 | 134.48 | 152.73 | 126.65 |
| CrH               | 10.60  | 7.45   | 8.70   | 4.41   | 6.48   |
| CrH <sub>3</sub>  | 37.10  | 44.26  | 32.45  | 49.54  | 37.66  |
| TcH <sub>3</sub>  | 9.94   | 34.91  | 13.93  | 47.94  | 31.29  |
| FeH <sub>6</sub>  | 42.90  | 70.65  | 40.51  | 43.01  | 70.44  |
| FeH <sub>5</sub>  | 45.80  | 45.88  | 35.49  | 51.74  | 39.90  |
| RuH               | 0.41   | 6.70   | 1.77   | 7.03   | 7.24   |

|                                                 |        |        |        |        |        |
|-------------------------------------------------|--------|--------|--------|--------|--------|
| RuH <sub>3</sub>                                | 3.57   | 33.74  | 8.67   | 53.58  | 31.08  |
| RuH <sub>3</sub>                                | 1.25   | 41.47  | 3.13   | 68.58  | 39.79  |
| OsH                                             | 2.10   | 5.98   | 9.78   | 4.91   | 6.13   |
| CoH                                             | 0.11   | 0.92   | 0.42   | 3.83   | 3.80   |
| PdH                                             | 9.00   | 15.21  | 2.54   | 21.98  | 16.15  |
| PdH                                             | 0.00   | 15.21  | 2.54   | 21.98  | 16.15  |
| PtH                                             | 15.00  | 23.01  | 7.79   | 21.15  | 20.99  |
| PtH                                             | 25.00  | 18.30  | 18.82  | 15.21  | 16.30  |
| AuH                                             | 21.00  | 7.88   | 4.12   | 8.26   | 8.19   |
| BH                                              | 21.40  | 65.96  | 57.01  | 28.85  | 54.07  |
| BH <sub>3</sub>                                 | 125.00 | 151.74 | 123.18 | 101.04 | 158.43 |
| AlH <sub>3</sub>                                | 11.50  | 113.79 | 23.06  | 153.60 | 125.98 |
| GaH <sub>3</sub>                                | 102.00 | 18.83  | 95.92  | 154.27 | 28.06  |
| InH <sub>5</sub>                                | 27.10  | 70.47  | 27.85  | 46.50  | 76.92  |
| InH <sub>3</sub>                                | 40.50  | 60.30  | 50.37  | 40.78  | 61.69  |
| SiH <sub>4</sub>                                | 55.00  | 138.08 | 61.30  | 117.22 | 152.49 |
| SiH <sub>4</sub>                                | 74.00  | 136.42 | 82.23  | 116.77 | 141.36 |
| SiH <sub>4</sub>                                | 35.00  | 131.10 | 162.75 | 151.11 | 143.30 |
| SiH <sub>4</sub>                                | 110.00 | 129.63 | 114.10 | 135.57 | 136.77 |
| SiH <sub>4</sub>                                | 35.10  | 101.10 | 32.20  | 56.75  | 98.92  |
| SiH <sub>4</sub>                                | 16.50  | 93.44  | 19.96  | 87.59  | 107.12 |
| Si <sub>2</sub> H <sub>6</sub>                  | 80.00  | 107.20 | 62.38  | 79.28  | 107.22 |
| Si <sub>2</sub> H <sub>6</sub>                  | 153.00 | -4.54  | 77.76  | 113.72 | 4.55   |
| Si <sub>2</sub> H <sub>6</sub>                  | 42.00  | 122.01 | 46.71  | 64.93  | 120.94 |
| GeH <sub>4</sub>                                | 64.00  | 95.08  | 68.35  | 68.58  | 99.63  |
| GeH <sub>4</sub>                                | 57.00  | 74.88  | 76.71  | 52.45  | 82.01  |
| GeH <sub>4</sub>                                | 84.00  | 112.43 | 177.65 | 123.59 | 122.41 |
| GeH <sub>4</sub> (H <sub>2</sub> ) <sub>2</sub> | 90.00  | 105.33 | 86.36  | 94.87  | 122.55 |
| GeH <sub>4</sub>                                | 67.00  | 86.96  | 74.25  | 102.43 | 94.35  |
| Ge <sub>3</sub> H <sub>11</sub>                 | 43.00  | 82.93  | 87.13  | 134.79 | 91.14  |
| GeH <sub>3</sub>                                | 90.00  | 64.30  | 81.29  | 91.58  | 65.01  |
| GeH <sub>3</sub>                                | 140.00 | 59.34  | 45.16  | 90.12  | 59.48  |
| SnH <sub>8</sub>                                | 72.00  | 70.13  | 76.62  | 78.08  | 85.44  |
| SnH <sub>4</sub>                                | 22.00  | 46.77  | 17.72  | 31.03  | 51.84  |
| SnH <sub>4</sub>                                | 62.00  | 53.48  | 26.61  | 39.98  | 60.09  |
| SnH <sub>4</sub>                                | 95.00  | 67.43  | 72.92  | 50.46  | 73.81  |
| SnH <sub>12</sub>                               | 93.00  | 84.99  | 89.44  | 97.49  | 106.12 |
| SnH <sub>14</sub>                               | 97.00  | 131.72 | 102.66 | 124.96 | 162.58 |
| PbH <sub>4</sub> (H <sub>2</sub> ) <sub>2</sub> | 107.00 | 55.20  | 35.90  | 49.31  | 66.89  |
| PH <sub>4</sub>                                 | 1.90   | 26.55  | 9.74   | 18.11  | 32.89  |
| PH <sub>2</sub>                                 | 29.50  | 94.95  | 36.60  | 33.49  | 79.88  |
| AsH                                             | 21.20  | 47.34  | 12.84  | 22.75  | 37.62  |
| AsH <sub>8</sub>                                | 151.40 | 132.09 | 161.71 | 118.12 | 151.41 |
| SbH                                             | 14.60  | 34.35  | 13.74  | 20.26  | 28.11  |



|                                   |        |        |        |        |        |
|-----------------------------------|--------|--------|--------|--------|--------|
| SbH <sub>4</sub>                  | 102.20 | 68.23  | 89.83  | 46.37  | 72.50  |
| BiH <sub>2</sub>                  | 39.00  | 48.65  | 38.14  | 20.79  | 45.46  |
| BiH <sub>3</sub>                  | 65.00  | 67.45  | 61.37  | 51.61  | 70.30  |
| SbH <sub>3</sub>                  | 68.00  | 68.71  | 69.33  | 43.28  | 68.87  |
| BiH                               | 30.00  | 36.66  | 30.92  | 35.25  | 32.15  |
| BiH <sub>2</sub>                  | 65.00  | 49.09  | 60.98  | 23.25  | 46.69  |
| BiH <sub>4</sub>                  | 93.00  | 63.53  | 85.99  | 41.89  | 67.12  |
| BiH <sub>6</sub>                  | 113.00 | 78.39  | 104.69 | 83.50  | 90.14  |
| (H <sub>2</sub> S)2H <sub>2</sub> | 204.00 | 175.00 | 201.05 | 128.81 | 177.80 |
| H <sub>3</sub> S                  | 225.00 | 181.77 | 222.75 | 130.26 | 185.01 |
| H <sub>4</sub> S <sub>3</sub>     | 2.10   | 51.00  | 13.24  | 23.96  | 44.96  |
| H <sub>5</sub> S <sub>2</sub>     | 79.00  | 58.23  | 73.86  | 40.13  | 62.05  |
| HSe <sub>2</sub>                  | 5.00   | 27.09  | 9.89   | 5.56   | 19.21  |
| HSe                               | 42.00  | 53.75  | 26.25  | 31.97  | 40.70  |
| H <sub>3</sub> Se                 | 116.00 | 135.64 | 119.19 | 129.81 | 140.22 |
| HSe                               | 23.00  | 54.28  | 23.41  | 21.11  | 41.60  |
| H <sub>4</sub> Te                 | 104.00 | 84.72  | 102.92 | 53.13  | 84.16  |
| H <sub>5</sub> Te <sub>2</sub>    | 58.00  | 67.16  | 60.54  | 41.60  | 65.00  |
| HTe                               | 28.00  | 40.61  | 19.62  | 20.88  | 32.23  |
| H <sub>4</sub> Te                 | 76.00  | 77.02  | 80.23  | 53.19  | 79.02  |
| PoH <sub>4</sub>                  | 53.60  | 52.98  | 46.00  | 37.46  | 57.05  |
| PoH                               | 0.65   | -9.46  | 5.75   | 17.23  | 0.00   |
| PoH <sub>2</sub>                  | 0.00   | 42.58  | 3.21   | 18.28  | 39.75  |
| PoH <sub>6</sub>                  | 4.68   | 81.85  | 14.01  | 58.62  | 88.22  |
| HBr                               | 51.00  | 39.22  | 49.92  | 16.75  | 32.48  |
| HCl                               | 40.00  | 53.37  | 51.68  | 18.87  | 41.94  |
| HBr                               | 27.00  | 35.28  | 24.38  | 13.93  | 28.62  |
| HCl                               | 20.00  | 36.26  | 18.56  | 12.83  | 29.19  |
| H <sub>2</sub> I                  | 8.00   | 7.25   | 9.14   | 5.28   | 11.63  |
| H <sub>4</sub> I                  | 12.50  | 52.35  | 25.24  | 37.86  | 57.30  |
| H <sub>2</sub> I                  | 5.30   | -9.46  | 8.43   | 0.45   | 0.00   |
| H <sub>2</sub> I                  | 33.00  | 35.58  | 27.00  | 17.58  | 34.30  |
| MgH <sub>2</sub>                  | 23.00  | 63.73  | 34.44  | 78.07  | 63.31  |
| MgH <sub>4</sub>                  | 37.00  | 76.66  | 38.72  | 49.93  | 90.67  |
| MgH <sub>12</sub>                 | 60.00  | 137.99 | 62.30  | 130.06 | 175.92 |
| PH <sub>2</sub>                   | 95.00  | 78.35  | 84.15  | 70.98  | 77.68  |
| H                                 | 318.00 | 282.60 | 257.96 | 442.30 | 367.81 |
| H                                 | 109.00 | 227.84 | 108.06 | 256.53 | 298.84 |
| LiScH <sub>10</sub>               | 52.00  | 65.19  | 72.11  | 50.09  | 69.41  |
| Li <sub>2</sub> ScH <sub>20</sub> | 242.00 | 120.13 | 230.93 | 98.06  | 144.94 |
| Li <sub>2</sub> ScH <sub>16</sub> | 262.00 | 203.80 | 212.05 | 205.23 | 231.32 |
| Li <sub>2</sub> ScH <sub>16</sub> | 281.00 | 204.05 | 212.05 | 205.59 | 231.72 |
| Li <sub>2</sub> ScH <sub>17</sub> | 94.00  | 177.00 | 90.29  | 155.68 | 198.82 |
| Li <sub>2</sub> LaH <sub>17</sub> | 118.00 | 160.36 | 114.38 | 158.02 | 184.51 |

|                             |        |        |        |        |        |
|-----------------------------|--------|--------|--------|--------|--------|
| $\text{Li}_2\text{YH}_{16}$ | 251.00 | 198.25 | 239.15 | 203.78 | 229.76 |
| $\text{Li}_2\text{YH}_{17}$ | 64.00  | 188.43 | 68.55  | 179.57 | 221.29 |
| $\text{CaYH}_{20}$          | 250.00 | 200.09 | 229.74 | 252.49 | 243.36 |
| $\text{Ca}_2\text{YH}_{18}$ | 217.00 | 196.80 | 230.89 | 219.67 | 229.30 |
| $\text{Ca}_3\text{YH}_{24}$ | 225.00 | 201.11 | 221.84 | 226.59 | 236.53 |
| $\text{CaY}_3\text{H}_{24}$ | 252.00 | 167.62 | 248.25 | 191.32 | 187.32 |
| $\text{CaScH}_2$            | 31.00  | 2.99   | 2.63   | 8.34   | 5.94   |
| $\text{CaScH}_4$            | 2.00   | 14.38  | 26.13  | 27.91  | 16.64  |
| $\text{CaScH}_6$            | 57.00  | 94.54  | 75.24  | 144.70 | 104.21 |
| $\text{CaScH}_8$            | 212.00 | 116.69 | 201.36 | 91.26  | 128.89 |
| $\text{CaScH}_{12}$         | 175.00 | 159.67 | 203.13 | 168.88 | 174.85 |
| $\text{BeLaH}_8$            | 191.00 | 83.08  | 111.63 | 140.65 | 97.45  |
| $\text{BeYH}_8$             | 249.00 | 29.38  | 242.54 | 143.70 | 41.20  |
| $\text{BeCeH}_8$            | 201.00 | 87.94  | 197.01 | 153.86 | 105.23 |
| $\text{BeThH}_7$            | 70.00  | 69.53  | 78.12  | 118.03 | 78.22  |

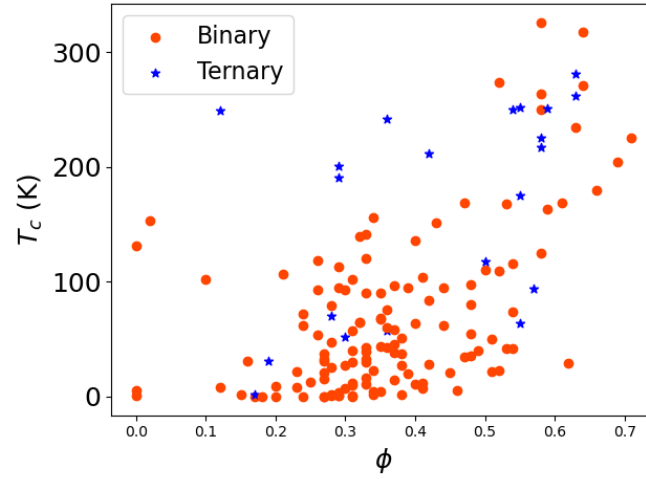

Figure 2: Reference  $T_c$  values with respect to the networking value,  $\phi$ , of the binary and ternary systems in the database.

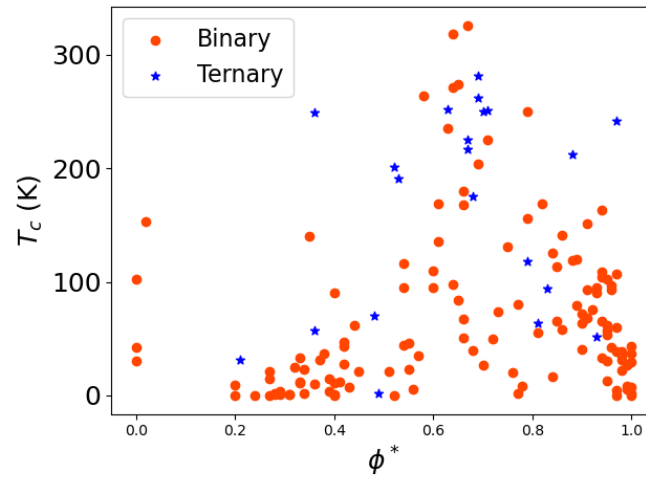

Figure 3: Reference  $T_c$  values with respect to the molecularity index,  $\phi^*$ , of the binary and ternary systems in the database.

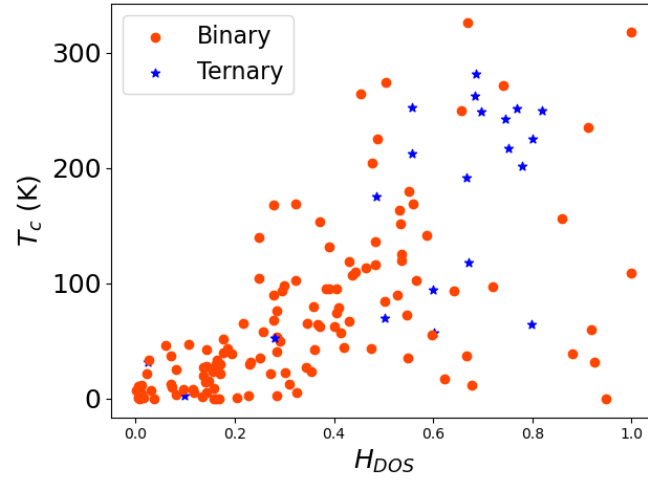

Figure 4: Reference  $T_c$  values with respect to  $H_{DOS}$  of the binary and ternary systems in the database.

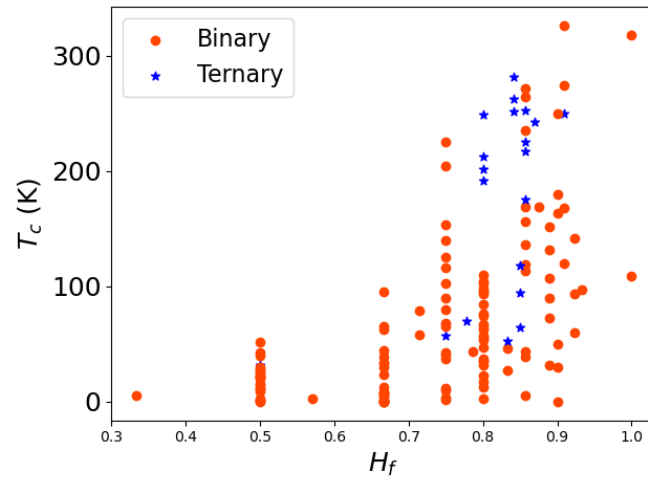

Figure 5: Reference  $T_c$  values with respect to the hydrogen fraction,  $H_f$ , of the binary and ternary systems in the database.

## References

- [1] Sun, Y.; Wang, Y.; Zhong, X.; Xie, Y.; Liu, H. High-temperature superconducting ternary Li-R-H superhydrides at high pressures (R=Sc, Y, La). *Phys. Rev. B* **2022**, 24519.
- [2] Zhao, W.; Duan, D.; Yao, X.; Huo, Z.; Jiang, Q.; Cui, T. Pressure-induced high- $T_c$  superconductivity in the ternary clathrate system Y-Ca-H. *Phys. Rev. B* **2022**, 14521.
- [3] Shi, L.-T.; Wei, Y.-K.; Liang, A.-K.; Turnbull, R.; Cheng, C.; Chen, X.-R.; Ji, G.-F. Prediction of pressure-induced superconductivity in the novel ternary system ScCaH $_{2n}$  ( $n = 1-6$ ). *J. Mater. Chem. C* **2021**, 7284–7288.
- [4] Zhang, Z.; Cui, T.; Hutcheon, M. J.; Shipley, A. M.; Song, H.; Du, M.; Kresin, V. Z.; Duan, D.; Pickard, C. J.; Yao, Y. Design Principles for High-Temperature Superconductors with a Hydrogen-Based Alloy Backbone at Moderate Pressure. *Phys. Rev. Lett.* **2022**, 47001.
- [5] Sun, Y.; Sun, S.; Zhong, X.; Liu, H. Prediction for high superconducting ternary hydrides below megabar pressure. *J. Phys. Condens. Matter* **2022**, 505404.
